# Supplementary material for: Transcriptome analysis of immature xylem in the Chinese fir at different developmental phases
Source: PeerJ. 2016 Jun 7;4:e2097. doi: 10.7717/peerj.2097 (PMC4906661; doi:10.7717/peerj.2097)
Supplement: Table S4 [file peerj-04-2097-s004.xlsx]

## Sheet: MYB
	#ID	FDR	log2FC	regulated	Swissprot_annotation	nr_annotation
15Y-VS-21Y	c104123.graph_c0	5.77246e-83	-5.70748	down	Putative laccase-17 (Precursor) GN=OsJ_031367 OS=Oryza sativa subsp. japonica (Rice) PE=3 SV=1	laccase [Pinus taeda]
	c89668.graph_c0	4.03661e-05	3.54458	up	Myb-related protein 3R-1 GN=MYB3R-1 OS=Arabidopsis thaliana (Mouse-ear cress) PE=2 SV=1	hypothetical protein VITISV_020519 [Vitis vinifera]
	c84067.graph_c0	0.000164791	3.89104	up	Transcription factor MYB3 GN=MYB3 OS=Arabidopsis thaliana (Mouse-ear cress) PE=1 SV=1	MYB-like protein [Taxus globosa]
	c106541.graph_c0	4.40764e-06	-5.9102	down	Transcription factor MYB44 GN=K8K14.2 OS=Arabidopsis thaliana (Mouse-ear cress) PE=2 SV=1	R2R3-MYB transcription factor MYB3 [Picea glauca]
	c90780.graph_c0	0.000300661	2.7735	up	Transcription factor MYB86 GN=F21E10.4 OS=Arabidopsis thaliana (Mouse-ear cress) PE=2 SV=1	R2R3-MYB transcription factor MYB8 [Picea glauca]
	c98343.graph_c0	3.27394e-10	-1.69583	down	Transcription factor MYB98 GN=MYB98 OS=Arabidopsis thaliana (Mouse-ear cress) PE=2 SV=1	Myb-related protein B [Medicago truncatula]
	c85467.graph_c0	0.00373101	#NAME?	down	Transcription factor MYB3 GN=MYB3 OS=Arabidopsis thaliana (Mouse-ear cress) PE=1 SV=1	MYB-like protein [Taxus globosa]
	c90208.graph_c0	2.56086e-23	-5.05721	down	Transcription factor MYB44 GN=K8K14.2 OS=Arabidopsis thaliana (Mouse-ear cress) PE=2 SV=1	R2R3-MYB transcription factor MYB3 [Pinus taeda]
	c92747.graph_c0	1.18351e-22	-4.4227	down	Transcription factor MYB86 GN=F21E10.4 OS=Arabidopsis thaliana (Mouse-ear cress) PE=2 SV=1	hypothetical protein M569_08448, partial [Genlisea aurea]
	c38459.graph_c0	2.76896e-68	-5.44448	down	Transcription factor MYB86 GN=F21E10.4 OS=Arabidopsis thaliana (Mouse-ear cress) PE=2 SV=1	R2R3-MYB transcription factor MYB8 [Picea glauca]
	c77808.graph_c0	5.72301e-43	-4.95856	down	Transcription factor MYB46 GN=MYB46 OS=Arabidopsis thaliana (Mouse-ear cress) PE=2 SV=1	R2R3-MYB transcription factor MYB4 [Picea glauca]
	c97407.graph_c0	0.000382117	3.22001	up	Transcription factor MYB3 GN=MYB3 OS=Arabidopsis thaliana (Mouse-ear cress) PE=1 SV=1	unknown [Picea sitchensis]
	c105872.graph_c0	0.000933513	-2.28608	down	Transcription factor GAMYB OS=Oryza sativa subsp. japonica (Rice) PE=2 SV=1	myb domain protein 33 [Larix kaempferi]
	c102508.graph_c1	8.83014e-05	2.70523	up	Transcription factor GAMYB OS=Oryza sativa subsp. japonica (Rice) PE=2 SV=1	predicted protein [Physcomitrella patens subsp. patens]
	c47307.graph_c0	4.14671e-22	-2.48048	down	Protein ODORANT1 GN=ODO1 OS=Petunia hybrida (Petunia) PE=2 SV=1	R2R3 transcription factor [Cunninghamia lanceolata]
	c98346.graph_c0	4.4467e-16	-4.04351	down	Transcription factor TT2 GN=MOK9.18 OS=Arabidopsis thaliana (Mouse-ear cress) PE=1 SV=1	unknown [Picea sitchensis]
	c92562.graph_c0	1.99209e-23	-5.59244	down	Transcription factor MYB44 GN=K8K14.2 OS=Arabidopsis thaliana (Mouse-ear cress) PE=2 SV=1	R2R3 transcription factor [Cunninghamia lanceolata]

## Sheet: WRKY
	#ID	FDR	log2FC	regulated	Swissprot_annotation	nr_annotation
15Y-VS-21Y	c48904.graph_c0	1.42446e-15	-2.65591	down	Probable WRKY transcription factor 12 GN=WRKY12 OS=Arabidopsis thaliana (Mouse-ear cress) PE=2 SV=1	unknown [Picea sitchensis]
	c100548.graph_c0	4.74511e-08	1.43103	up	Probable WRKY transcription factor 3 GN=WRKY3 OS=Arabidopsis thaliana (Mouse-ear cress) PE=2 SV=1	unknown [Picea sitchensis]
	c49459.graph_c0	0.00714745	1.12595	up	Probable WRKY transcription factor 21 GN=WRKY21 OS=Arabidopsis thaliana (Mouse-ear cress) PE=2 SV=1	unknown [Picea sitchensis]
	c70863.graph_c0	1.33286e-08	-1.88551	down	Probable WRKY transcription factor 7 GN=WRKY7 OS=Arabidopsis thaliana (Mouse-ear cress) PE=1 SV=1	WRKY transcription factor 46_b06 [Papaver somniferum]
	c97419.graph_c0	4.59042e-05	1.25055	up	Probable WRKY transcription factor 4 GN=WRKY4 OS=Arabidopsis thaliana (Mouse-ear cress) PE=1 SV=2	DNA-binding protein [Vitis thunbergii]
